# Supplementary material for: Spatial and Temporal Distribution Characteristics and Potential Sources of Microplastic Pollution in China’s Freshwater Environments
Source: MDPI journal article supplement (doi:10.3390/w16091270), 2024-04-29
Supplement: s1 [file s1]

## Supplementary Materials

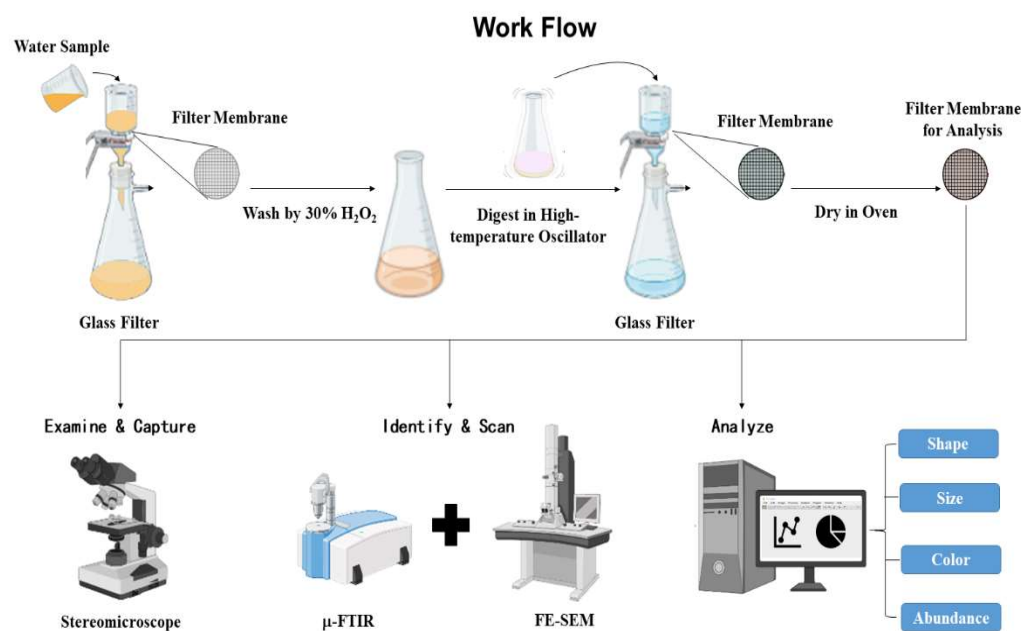

**Figure S1.** Work flow

**Table S1.** Detailed information of sampling sites

| Site | Location                 | River              | Latitude | Longitude | Population<br>(10 thousand) | GRP<br>(100 million RMB) | Annual Rainfall<br>(mm) |
|------|--------------------------|--------------------|----------|-----------|-----------------------------|--------------------------|-------------------------|
| A    | Nanjing,<br>Jiangsu      | Qinhuai<br>River   | 32.0566  | 118.7580  | 931.97                      | 14817.95                 | 1294.4                  |
| B    | Changzhou,<br>Jiangsu    | Datong<br>River    | 31.7393  | 119.9367  | 527.96                      | 7805.32                  | 1408.5                  |
| C    | Lianyungang,<br>Jiangsu  | Qiangwei<br>River  | 34.6856  | 119.1880  | 459.94                      | 3277.07                  | 1145.4                  |
| D    | Hangzhou,<br>Zhejiang    | Shangtang<br>River | 30.3006  | 120.1735  | 1196.50                     | 16105.83                 | 1882.0                  |
| E    | Wuhu,<br>Anhui           | Qingyi<br>River    | 31.3338  | 118.4399  | 388.47                      | 3753.00                  | 1888.4                  |
| F    | Jinan,<br>Shandong       | Xiaoqing<br>River  | 36.7085  | 117.0596  | 920.24                      | 10140.91                 | 548.7                   |
| G    | Zibo,<br>Shandong        | Fanyang<br>River   | 36.7921  | 117.9814  | 469.68                      | 3642.42                  | 789.7                   |
| H    | Taiyuan,<br>Shanxi       | Fenhe<br>River     | 37.9215  | 112.5303  | 530.41                      | 4153.25                  | 542.9                   |
| I    | Anyang,<br>Henan         | Anyang<br>River    | 36.1138  | 114.4593  | 547.76                      | 2300.50                  | 637.1                   |
| J    | Zhoukou,<br>Henan        | Shaying<br>River   | 33.6318  | 114.6515  | 901.87                      | 3267.19                  | 949.9                   |
| K    | Shijiazhuang,<br>Hebei   | Hutuo<br>River     | 38.1211  | 114.5706  | 1123.51                     | 5935.10                  | 551.4                   |
| L    | Jiamusi,<br>Heilongjiang | Songhua<br>River   | 47.2549  | 132.0174  | 230.00                      | 811.80                   | 830.5                   |
| M    | Ningde,<br>Fujian        | Lantian<br>River   | 26.6691  | 119.5597  | 315.60                      | 2619.00                  | 1811.2                  |

---

|   |                      |                   |         |          |        |         |        |
|---|----------------------|-------------------|---------|----------|--------|---------|--------|
| N | Yiyang,<br>Hunan     | Zishui<br>River   | 28.5998 | 112.3703 | 385.16 | 1853.48 | 1711.0 |
| O | Zigong,<br>Sichuan   | Fuxi<br>River     | 29.3539 | 104.8289 | 249.00 | 1458.44 | 1191.7 |
| P | Fuling,<br>Chongqing | Wujing<br>River   | 29.7190 | 107.4104 | 111.50 | 1225.08 | 1139.1 |
| Q | Guilin,<br>Guangxi   | Lijiang<br>River  | 25.1781 | 110.4118 | 493.74 | 2130.41 | 2268.3 |
| R | Panzhou,<br>Guizhou  | Lufan<br>River    | 25.5981 | 104.5521 | 303.16 | 1339.62 | 1383.1 |
| S | Wuzhong,<br>Ningxia  | Xinning<br>River  | 38.0396 | 106.2236 | 138.27 | 621.77  | 257.4  |
| T | Xining,<br>Qinghai   | Beichuan<br>River | 36.7234 | 101.7704 | 246.79 | 1372.98 | 506.4  |
| U | Linzhi,<br>Tibet     | Niyang<br>River   | 29.6765 | 94.3575  | 23.89  | 208.29  | 650.0  |

---

**Table S2.** Land use types of sampling sites (%)

| <b>Site</b> | <b>Farm</b> | <b>Garden</b> | <b>Forest</b> | <b>Grass</b> | <b>Wetland</b> | <b>Town</b> | <b>Transport</b> | <b>Water</b> |
|-------------|-------------|---------------|---------------|--------------|----------------|-------------|------------------|--------------|
| <b>A</b>    | 21.98       | 2.20          | 23.58         | 1.74         | 0.25           | 22.63       | 4.68             | 22.94        |
| <b>B</b>    | 20.29       | 5.76          | 17.47         | 2.22         | 0.14           | 24.09       | 4.65             | 25.38        |
| <b>C</b>    | 49.24       | 2.09          | 5.77          | 1.21         | 2.66           | 16.83       | 3.86             | 18.34        |
| <b>D</b>    | 7.38        | 5.76          | 65.61         | 0.32         | 0.06           | 10.87       | 2.08             | 7.92         |
| <b>E</b>    | 38.30       | 0.92          | 20.68         | 0.47         | 0.50           | 15.87       | 2.08             | 21.18        |
| <b>F</b>    | 34.49       | 10.19         | 24.83         | 2.71         | 0.04           | 18.77       | 3.07             | 5.90         |
| <b>G</b>    | 27.28       | 13.63         | 29.33         | 2.99         | 0.16           | 19.69       | 2.96             | 3.96         |
| <b>H</b>    | 16.90       | 2.60          | 40.20         | 24.30        | 2.20           | 9.40        | 2.00             | 2.40         |
| <b>I</b>    | 53.10       | 1.97          | 21.07         | 2.05         | 0.06           | 17.18       | 2.64             | 1.93         |
| <b>J</b>    | 70.65       | 0.54          | 4.18          | 0.03         | 0.04           | 17.93       | 2.21             | 4.42         |
| <b>K</b>    | 33.95       | 7.67          | 29.48         | 6.59         | 0.49           | 16.18       | 2.78             | 2.86         |
| <b>L</b>    | 67.18       | 0.06          | 15.67         | 1.08         | 4.85           | 2.41        | 1.69             | 7.06         |
| <b>M</b>    | 8.13        | 9.74          | 69.85         | 1.06         | 2.97           | 3.29        | 1.59             | 3.37         |
| <b>N</b>    | 22.48       | 1.77          | 49.07         | 0.11         | 5.85           | 7.72        | 1.74             | 11.26        |
| <b>O</b>    | 44.30       | 6.53          | 25.75         | 0.28         | 0.05           | 14.16       | 2.46             | 6.47         |
| <b>P</b>    | 28.74       | 3.47          | 51.64         | 0.09         | 0.41           | 8.12        | 2.22             | 5.31         |
| <b>Q</b>    | 6.89        | 12.74         | 71.50         | 1.46         | 0.13           | 3.74        | 1.08             | 2.46         |
| <b>R</b>    | 28.10       | 0.00          | 59.37         | 2.33         | 0.01           | 6.70        | 2.35             | 1.14         |
| <b>S</b>    | 20.80       | 1.79          | 16.89         | 50.83        | 0.62           | 4.85        | 1.82             | 2.40         |
| <b>T</b>    | 1.07        | 0.12          | 8.72          | 74.82        | 9.67           | 0.70        | 0.27             | 4.63         |
| <b>U</b>    | 0.41        | 0.01          | 16.42         | 73.47        | 3.95           | 0.15        | 0.15             | 5.44         |

**Table S3.** Group information and microplastics abundance (n/m<sup>3</sup>)

| <b>Group</b> | <b>Site</b> | <b>MPs</b> | <b>Group</b> | <b>Site</b> | <b>MPs</b> | <b>Group</b> | <b>Site</b> | <b>MPs</b> |
|--------------|-------------|------------|--------------|-------------|------------|--------------|-------------|------------|
| A1           | T           | 1738       | B1           | M           | 2850       | C1           | N           | 4175       |
| A2           | U           | 1875       | B2           | D           | 3000       | C2           | S           | 4363       |
| A3           | H           | 2013       | B3           | O           | 3113       | C3           | I           | 4613       |
| A4           | P           | 2250       | B4           | F           | 3313       | C4           | C           | 4975       |
| A5           | B           | 2450       | B5           | R           | 3513       | C5           | K           | 5250       |
| A6           | G           | 2563       | B6           | Q           | 3725       | C6           | J           | 5500       |
| A7           | A           | 2713       | B7           | E           | 3913       | C7           | L           | 5650       |

Note: Arranged from low to high microplastics abundance.
